# Supplementary material for: Sixteen‐Week Physical Activity Intervention in Subjects With Increased Cardiometabolic Risk Shifts Innate Immune Function Towards a Less Proinflammatory State
Source: PubMed Central journal article supplement — J Am Heart Assoc. 2019 Oct 18;8(21):e013764. doi: 10.1161/JAHA.119.013764 (PMC6898840; doi:10.1161/jaha.119.013764), 2019-10-18
Supplement: JAH3-8-e013764-s001.pdf [file JAH3-8-e013764-s001.pdf]

## **SUPPLEMENTAL MATERIAL**

## Supplemental Tables

Table S1. Product details of cytokines and chemokines measured with ELISA.

|                     | Item                       | Manufacturer | Category number |
|---------------------|----------------------------|--------------|-----------------|
| 24 hour stimulation | Human TNF $\alpha$ duoset  | R&D          | DY210           |
|                     | Human IL-1 $\beta$ duoset  | R&D          | DY201           |
|                     | Human IL-6 duoset          | R&D          | DY206           |
|                     | Human Pelipair IL-8        | Sanquin      | M9318           |
|                     | Human Pelipair IL-10       | Sanquin      | M9310           |
| 7 day stimulation   | Human PelipairIFN $\gamma$ | Sanquin      | M9333           |
|                     | Human IL-17 duoset         | R&D          | DY317           |
|                     | Human IL-22 duoset         | R&D          | DY782           |
| Plasma              | Human VCAM-1 duoset        | R&D          | DY809           |
|                     | Human E-selectin duoset    | R&D          | DY724           |
|                     | Human MMP-2 duoset         | R&D          | DY902           |
|                     | Human Leptin duoset        | R&D          | DY398           |
|                     | Human Adiponectin duoset   | R&D          | DY1065          |

MMP-2 indicates matrix metalloproteinase-2; VCAM-1, vascular cell adhesion molecule 1.

Supplemental Tables S2-S4 show data of group1.0.

Table S2. Circulating cytokines in group1.0 (n=8).

| Circulating cytokines | Pre              | Post             |
|-----------------------|------------------|------------------|
| IL-1RA (pg/mL)        | 263 [215-377]    | 260 [199-371]    |
| IL-1 $\beta$ (pg/mL)  | 0.15 [0.09-0.17] | 0.15 [0.08-0.27] |
| IL-6 (pg/mL)          | 2.66 [1.90-4.26] | 3.43 [1.82-5.62] |
| IL-18 (pg/mL)         | 172 [112-193]    | 173 [117-226]    |

\*  $P < 0.05$ , \*\*  $P < 0.01$ . Wilcoxon signed rank test, median, IQR. IL: interleukin.

Table S3. Cytokine production capacity in group1.0 (n=8). **A.** Innate cytokine production after 24 hour stimulation, **B.** Adaptive cytokine production after 7 day stimulation.

| A. Innate cytokine production | Pre               | Post                |
|-------------------------------|-------------------|---------------------|
| Unstimulated                  |                   |                     |
| IL-1 $\beta$ (pg/mL)          | 78 [78-78]        | 78 [78-78]          |
| IL-6 (ng/mL)                  | 0.5 [0.5-0.5]     | 0.5 [0.5-0.5]       |
| IL-8 (ng/mL)                  | 1.6 [1.6-1.6]     | 1.6 [1.6-1.6]       |
| IL-10 (pg/mL)                 | 47 [47-47]        | 47 [47-47]          |
| TNF $\alpha$ (pg/mL)          | 78 [78-127]       | 78 [78-110]         |
| LPS stimulated                |                   |                     |
| IL-1 $\beta$ (pg/mL)          | 3478 [1689-6317]  | 12187 [6393-16901]* |
| IL-6 (pg/mL)                  | 12.6 [7.0-27.7]   | 23.4 [21.6-25.9]*   |
| IL-8 (ng/mL)                  | 55.6 [27.7-87.7]  | 88.1 [67.7-123.2]*  |
| IL-10 (pg/mL)                 | 930 [804-1920]    | 1606 [974-1926]     |
| TNF $\alpha$ (pg/mL)          | 447 [182-1117]    | 787 [489-1590]*     |
| P3C stimulated                |                   |                     |
| IL-1 $\beta$ (pg/mL)          | 2637 [1234-4333]  | 3552 [2617-5441]    |
| IL-6 (ng/mL)                  | 16.4 [10.9-22.6]  | 20.1 [17.1-26.7]*   |
| IL-8 (ng/mL)                  | 84.4 [70.7-114.6] | 123.3 [89.4-157.6]* |
| IL-10 (pg/mL)                 | 170 [106-768]     | 200 [128-440]       |
| TNF $\alpha$ (pg/mL)          | 135 [115-297]     | 493 [110-923]       |
| R848 stimulated               |                   |                     |
| IL-1 $\beta$ (pg/mL)          | OFR               | OFR                 |
| IL-6 (ng/mL)                  | 24.5 [18.7-40.6]  | 34.3 [26.9-50.1]    |
| IL-8 (ng/mL)                  | 37.7 [24.4-51.5]  | 67.7 [44.7-85.1]*   |
| IL-10 (pg/mL)                 | 1249 [1050-2642]  | 1299 [784-3837]     |
| TNF $\alpha$ (pg/mL)          | 6093 [2811-7898]  | 5148 [2871-7435]    |
| C16.0 stimulated              |                   |                     |
| IL-1 $\beta$ (pg/mL)          | 39 [39-145]       | 176 [39-372]*       |
| IL-6 (pg/mL)                  | 94 [94-225]       | 252 [94-1061]*      |
| IL-8 (ng/mL)                  | 2.1 [1.6-4.5]     | 6.3 [1.6-20.1]*     |
| TNF $\alpha$ (pg/mL)          | 272 [168-363]     | 322 [183-555]       |
| C16.0-MSU stimulated          |                   |                     |
| IL-1 $\beta$ (pg/mL)          | 39 [39-374]       | 299 [46-798]        |
| IL-6 (pg/mL)                  | 94 [94-1542]      | 882 [166-1723]      |
| IL-8 (ng/mL)                  | 3.0 [1.6-20.6]    | 22.9 [1.7-31.2]     |
| TNF $\alpha$ (pg/mL)          | 98 [78-119]       | 124 [78-730]        |

| B. Adaptive cytokine production | Pre             | Post             |
|---------------------------------|-----------------|------------------|
| Unstimulated                    |                 |                  |
| IFN $\gamma$ (pg/mL)            | 12 [12-12]      | 12 [12-12]       |
| IL-22 (pg/mL)                   | 78 [78-78]      | 78 [78-78]       |
| IL-17 (pg/mL)                   | 39 [39-39]      | 39 [39-39]       |
| Candida stimulated              |                 |                  |
| IFN $\gamma$ (pg/mL)            | 448 [179-1032]  | 293 [110-553]    |
| IL-22 (pg/mL)                   | 4396 [803-9046] | 2755 [1132-7182] |
| IL-17 (pg/mL)                   | 556 [350-819]   | 444 [373-897]    |
| St. aureus stimulated           |                 |                  |
| IFN $\gamma$ (pg/mL)            | 44 [18-150]     | 75 [61-1161]*    |
| IL-22 (pg/mL)                   | 158 [78-464]    | 101 [78-754]     |
| IL-17 (pg/mL)                   | 147 [39-810]    | 63 [39-262]      |

\*  $P < 0.05$ , \*\*  $P < 0.01$ . Wilcoxon signed rank test, median, IQR. OFR indicates out of range. LPS, lipopolysaccharide; P3C, Pam3CysK4; R848, Resiquimod; C16.0+MSU, C16.0 with monosodium urate crystals.

Table S4. Metabolism: Lactate and oxygen consumption in group1.0 (n=8).

| Oxygen consumption (O <sub>2</sub> /10 <sup>6</sup> cells) | Pre           | Post             |
|------------------------------------------------------------|---------------|------------------|
| Basal (pmol/sec)                                           | 2.5 $\pm$ 0.2 | 1.9 $\pm$ 0.5    |
| Leak (pmol/sec)                                            | 0.6 $\pm$ 0.2 | 0.6 $\pm$ 0.2    |
| Max (pmol/sec)                                             | 9.0 $\pm$ 1.0 | 7.1 $\pm$ 1.7    |
| ROX (pmol/sec)                                             | 0.1 $\pm$ 0.1 | 0.1 $\pm$ 0.1    |
| Absolute reserve (pmol/sec)                                | 6.5 $\pm$ 0.9 | 5.2 $\pm$ 1.3    |
| Relative reserve (%)                                       | 72 $\pm$ 2    | 73 $\pm$ 3       |
| Lactate production (pg/mL)                                 | 854 [708-986] | 1321 [1046-1339] |

\*  $P < 0.05$ , \*\*  $P < 0.01$ . Wilcoxon signed rank test. Basal respiration (basal), proton leak after inhibition of ATP synthase (leak), maximal oxygen consumption (max), residual oxygen consumption or non-mitochondrial oxygen consumption (ROX).

Table S5. Circulating markers of fat tissue, inflammation, oxidative stress and endothelial dysfunction (n=8).

| Circulating markers      | Pre              | Post             |
|--------------------------|------------------|------------------|
| Adiponectin (pg/mL)      | 4.17 [3.78-4.99] | 4.18 [2.75-5.50] |
| Leptin (µg/mL)           | 16.2 [10.2-20.0] | 14.4 [12.3-31.0] |
| Leptin adiponectin ratio | 5.1 [2.1-7.8]    | 5.6 [2.3-12.0]   |
| CRP (pg/mL)              | 2.72 [1.62-3.69] | 3.07 [2.22-3.54] |
| TBAR (nmol/L)            | 1.38 [1.33-1.72] | 1.41 [1.34-1.94] |
| MMP-2 (ng/mL)            | 377 [374-421]    | 383 [360-404]    |
| VCAM-1 (ng/mL)           | 908 [828-978]    | 938 [781-978]    |
| E-selectin (ng/mL)       | 10.3 [7.8-12.8]  | 10.8 [7.7-12.8]  |

\*  $P < 0.05$ , \*\*  $P < 0.01$ . Wilcoxon signed rank test, median, IQR. MMP-2 indicates matrix metalloproteinase-2; VCAM-1, vascular cell adhesion molecule 1.

Table S6. Cell types in PBMC fraction (n=8).

| Cell types in PBMC fraction | Pre           | Post          |
|-----------------------------|---------------|---------------|
| Neutrophils(%)              | 1.1 [0.7-1.4] | 0.9 [0.6-1.3] |
| Lymphocytes (%)             | 71 [69-74]    | 73 [67-81]*   |
| Monocytes(%)                | 28 [24-30]    | 26 [18-30]*   |

\*  $P < 0.05$ , \*\*  $P < 0.01$ . Wilcoxon signed rank test, median, IQR.

Table S7. Power analysis of cytokine production capacity.

| Stimulus | Cytokine      | Difference $\pm$ SD | r    | Power (1- $\beta$ ) | Sample size needed for $\beta=0.80$ |
|----------|---------------|---------------------|------|---------------------|-------------------------------------|
| LPS      | IL-6 (ng/mL)  | -8.1 $\pm$ 7.3      | 0.46 | 0.68                | 10                                  |
|          | IL-10 (pg/mL) | -611 $\pm$ 468      | 0.55 | 0.81                | 8                                   |
|          | IL-8 (ng/mL)  | -27 $\pm$ 41        | 0.21 | 0.31                | 24                                  |
| R848     | IL-6 (ng/mL)  | -22.4 $\pm$ 5.9     | 0.93 | 0.99                | 4                                   |
|          | IL-10 (pg/mL) | -959 $\pm$ 337      | 0.92 | 0.99                | 4                                   |
|          | IL-8 (ng/mL)  | -16.9 $\pm$ 18.2    | 0.40 | 0.53                | 13                                  |

Power calculations of cytokine production capacity using Wilcoxon-signed ranked test. Difference  $\pm$ SD indicates the difference in cytokine production capacity before and after intervention. R indicates correlation coefficient, LPS, lipopolysaccharide; R848, Resiquimod.

## Supplemental Figure

Figure S1. Gating strategy of monocyte subsets and expression markers. Monocytes were selected based on CD45<sup>+</sup> HLA-DR<sup>+</sup> and monocyte scatter properties, then CD3<sup>+</sup> lymphocytes and CD56<sup>+</sup> NK-cells were excluded, and monocyte subsets were identified in the CD14/CD16 plot as percentage of gated.

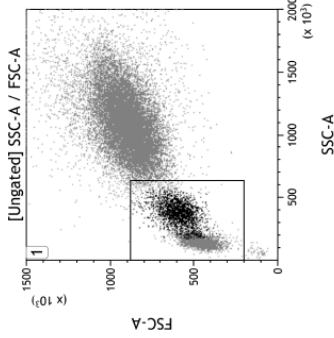

| SSC-A |        |
|-------|--------|
| Gate  | %Gated |
| All   | 26.859 |
| 1     | 100.00 |
|       | 5.614  |
|       | 20.90  |

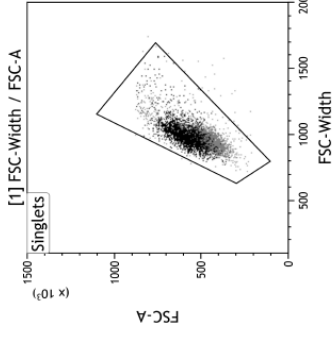

| FSC-Width |        |
|-----------|--------|
| Gate      | %Gated |
| All       | 100.00 |
| Singlets  | 99.54  |

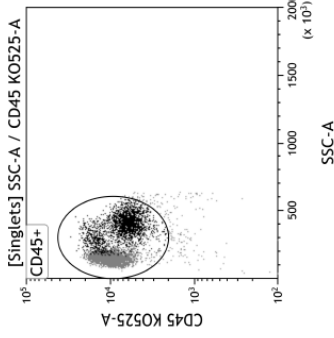

| SSC-A |        |
|-------|--------|
| Gate  | %Gated |
| All   | 100.00 |
| CD45+ | 96.66  |

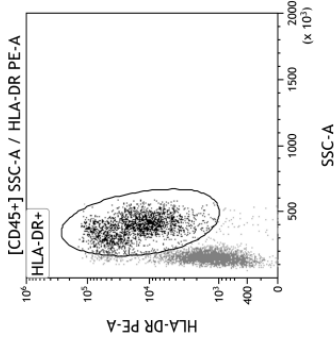

| SSC-A   |        |
|---------|--------|
| Gate    | %Gated |
| All     | 100.00 |
| HLA-DR+ | 39.94  |

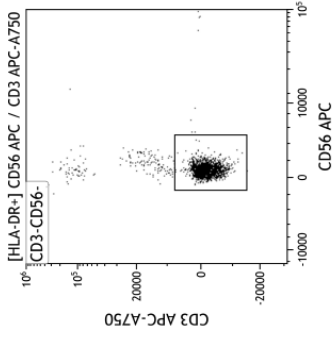

| CD56 APC  |        |
|-----------|--------|
| Gate      | %Gated |
| All       | 100.00 |
| CD3-CD56- | 91.32  |

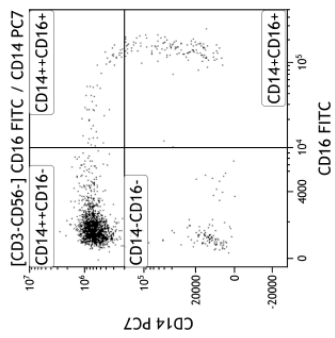

| CD16 FITC   |        |        |
|-------------|--------|--------|
| Gate        | Number | %Gated |
| All         | 1.842  | 100.00 |
| CD14-CD16-  | 117    | 6.35   |
| CD14+-CD16- | 1.545  | 83.88  |
| CD14++CD16+ | 53     | 2.88   |
| CD14+CD16+  | 127    | 6.89   |

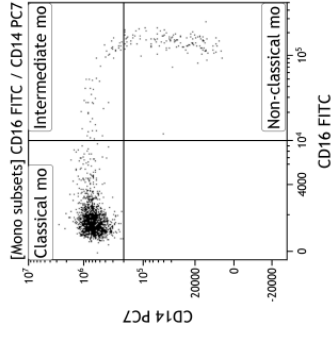

| CD16 FITC        |        |        |
|------------------|--------|--------|
| Gate             | Number | %Gated |
| All              | 1.725  | 100.00 |
| Classical mo     | 1.545  | 89.57  |
| Intermediate mo  | 53     | 3.07   |
| J--              | 0      | 0.00   |
| Non-classical mo | 127    | 7.36   |

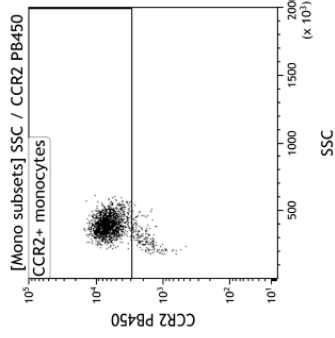

| SSC             |        |        |
|-----------------|--------|--------|
| Gate            | Number | %Gated |
| All             | 1.725  | 100.00 |
| CCR2+ monocytes | 1.541  | 89.33  |
|                 | 5.644  | 326.22 |
|                 | 6.481  | 42.42  |

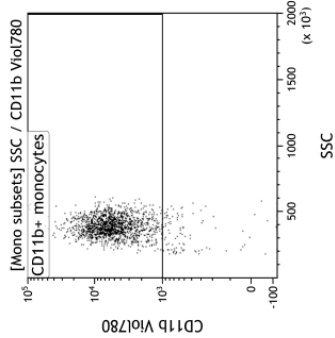

| SSC              |        |        |
|------------------|--------|--------|
| Gate             | Number | %Gated |
| All              | 1.725  | 100.00 |
| CD11b+ monocytes | 1.595  | 92.46  |
|                  | 4.260  | 246.12 |
|                  | 5.536  | 318.82 |

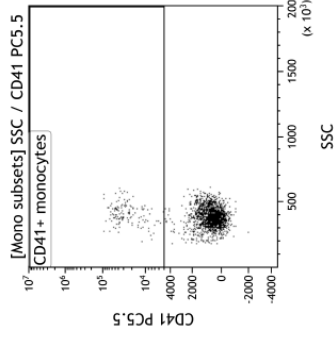

| SSC             |        |         |
|-----------------|--------|---------|
| Gate            | Number | %Gated  |
| All             | 1.725  | 100.00  |
| CD41+ monocytes | 1.31   | 7.59    |
|                 | 1.147  | 66.16   |
|                 | 24.909 | 1442.29 |
